# Supplementary material
Source: PubMed Central journal article supplement (PMC2771418)

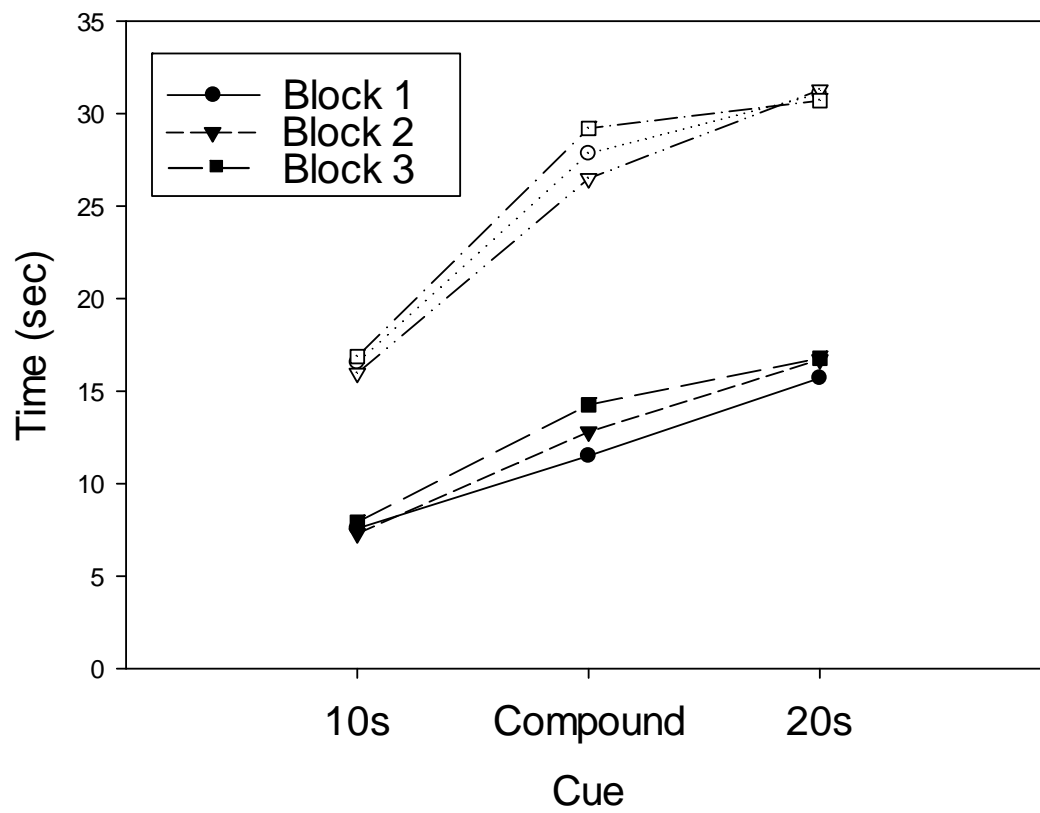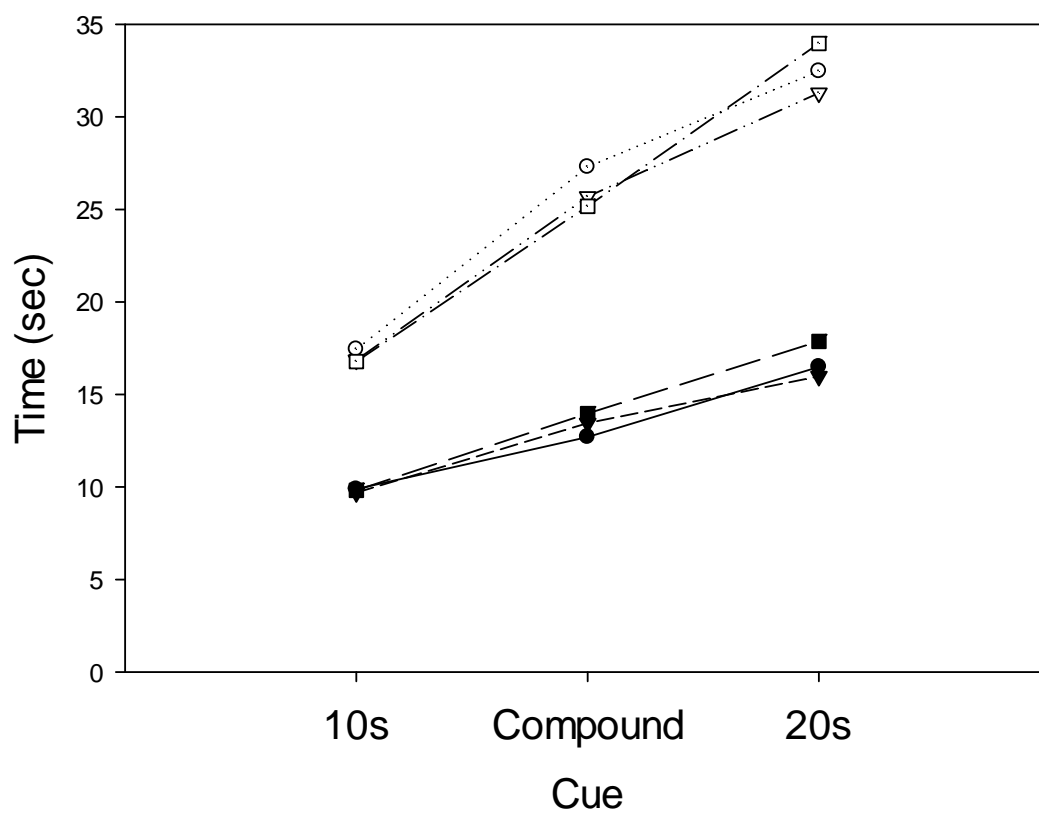

Supplement: NIHMS152041-supplement-01.pdf [file NIHMS152041-supplement-01.pdf]
